# Supplementary material
Source: PubMed Central journal article supplement (PMC3081151)

**A** AAV-DNM2 expression

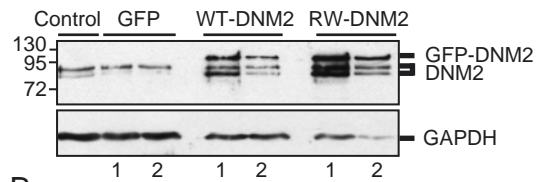

**B**

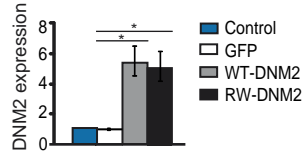

**C** Soluble : Insoluble DNM2

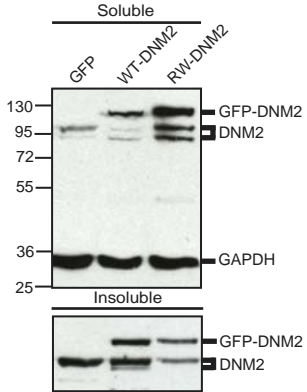

**D** Soluble : Insoluble DNM2

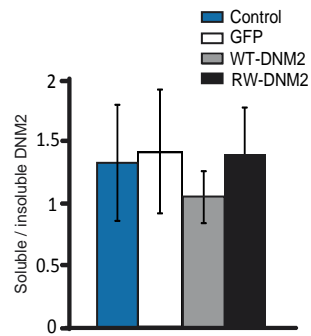

Supplementary figure 1

Supplement: mmc1.pdf [file mmc1.pdf]

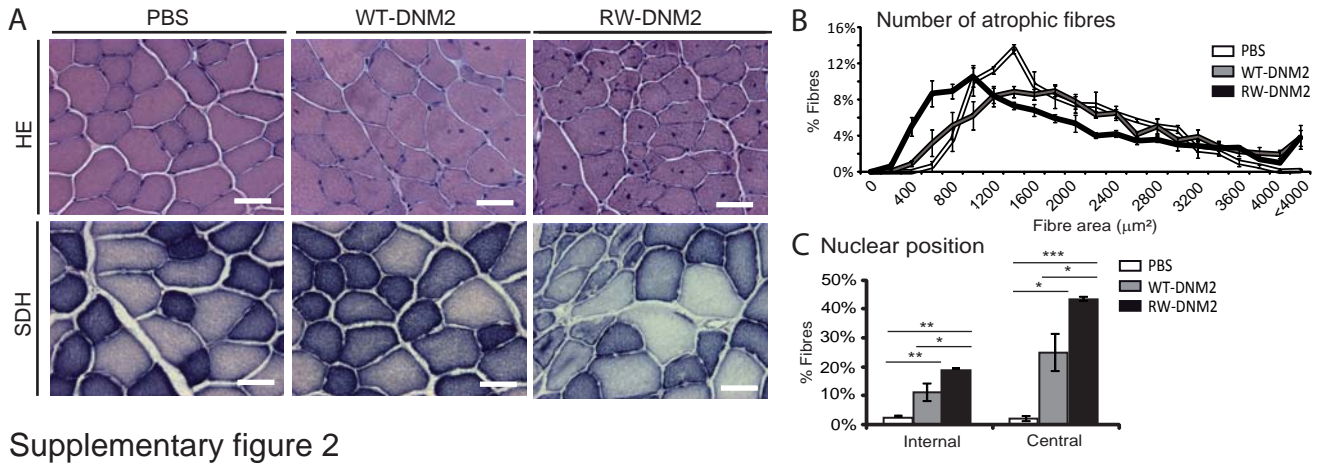

Supplementary figure 2

Supplement: mmc2.pdf [file mmc2.pdf]

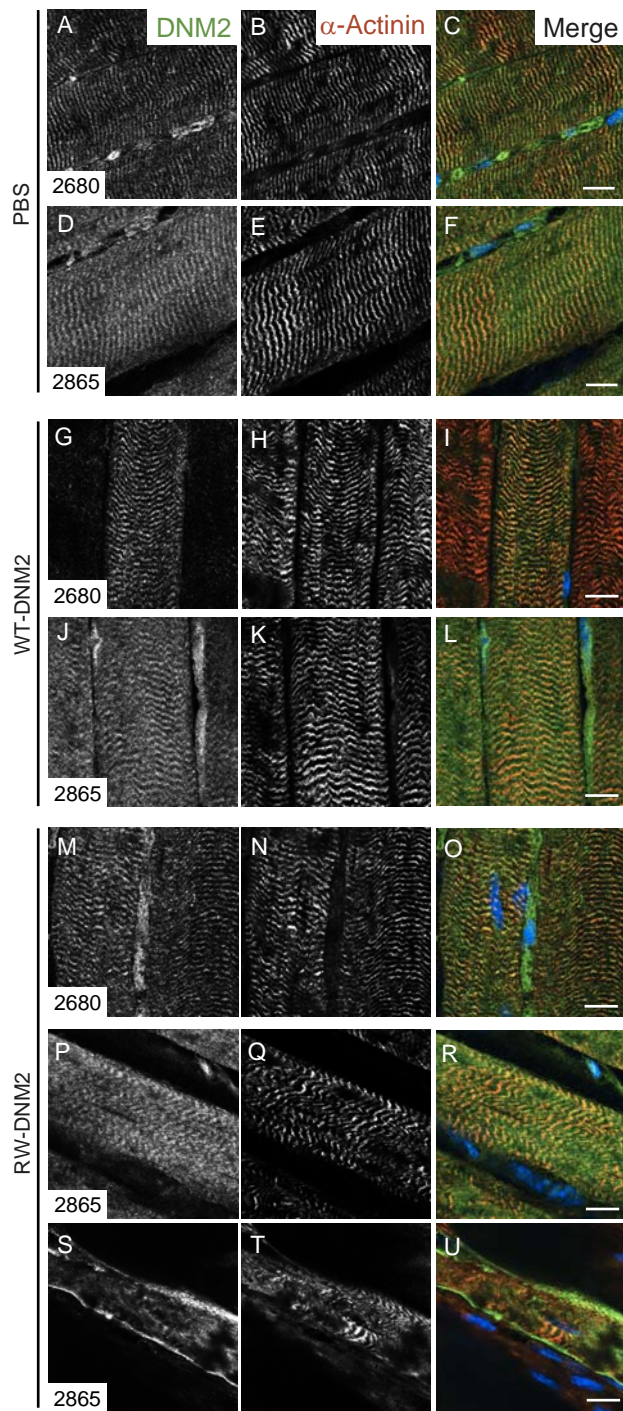

Supplementary figure 3

Supplement: mmc3.pdf [file mmc3.pdf]
